# Supplementary material for: Urban Sustainability at Risk Due to Soil Pollution by Heavy Metals—Case Study: Volos, Greece
Source: MDPI journal article supplement (doi:10.3390/land11071016), 2022-07-04
Supplement: s1 [file s1]

Table S1: Output of Tukey and LSD Fisher tests for Cu.

| Multiple Comparisons<br>Dependent Variable:<br>Cu |              |              |                             |            |        |                                                          |         |
|---------------------------------------------------|--------------|--------------|-----------------------------|------------|--------|----------------------------------------------------------|---------|
|                                                   | (I)<br>Years | (J)<br>Years | Mean<br>Difference<br>(I-J) | Std. Error | Sig.   | 95% Confidence<br>Interval<br>Lower Bound Upper<br>Bound |         |
| Tukey<br>HSD                                      | 2018         | 2019         | -3.2169                     | 3.2256     | 0.7510 | -11.5609                                                 | 5.1270  |
|                                                   |              | 2020         | -6.4242                     | 3.2256     | 0.1940 | -14.7681                                                 | 1.9197  |
|                                                   |              | 2021         | -7.9281                     | 3.2256     | 0.0690 | -16.2720                                                 | 0.4159  |
|                                                   | 2019         | 2018         | 3.2169                      | 3.2256     | 0.7510 | -5.1270                                                  | 11.5609 |
|                                                   |              | 2020         | -3.2073                     | 3.2256     | 0.7530 | -11.5512                                                 | 5.1367  |
|                                                   |              | 2021         | -4.7111                     | 3.2256     | 0.4630 | -13.0550                                                 | 3.6328  |
|                                                   | 2020         | 2018         | 6.4242                      | 3.2256     | 0.1940 | -1.9197                                                  | 14.7681 |
|                                                   |              | 2019         | 3.2073                      | 3.2256     | 0.7530 | -5.1367                                                  | 11.5512 |
|                                                   |              | 2021         | -1.5039                     | 3.2256     | 0.9660 | -9.8478                                                  | 6.8400  |
|                                                   | 2021         | 2018         | 7.9281                      | 3.2256     | 0.0690 | -0.4159                                                  | 16.2720 |
|                                                   |              | 2019         | 4.7111                      | 3.2256     | 0.4630 | -3.6328                                                  | 13.0550 |
|                                                   |              | 2020         | 1.5039                      | 3.2256     | 0.9660 | -6.8400                                                  | 9.8478  |
| LSD                                               | 2018         | 2019         | -3.2169                     | 3.2256     | 0.3200 | -9.5704                                                  | 3.1365  |
|                                                   |              | 2020         | -6,42419*                   | 3.2256     | 0.0480 | -12.7777                                                 | -0.0707 |
|                                                   |              | 2021         | -7,92806*                   | 3.2256     | 0.0150 | -14.2815                                                 | -1.5746 |
|                                                   | 2019         | 2018         | 3.2169                      | 3.2256     | 0.3200 | -3.1365                                                  | 9.5704  |
|                                                   |              | 2020         | -3.2073                     | 3.2256     | 0.3210 | -9.5607                                                  | 3.1462  |
|                                                   |              | 2021         | -4.7111                     | 3.2256     | 0.1450 | -11.0646                                                 | 1.6423  |
|                                                   | 2020         | 2018         | 6,42419*                    | 3.2256     | 0.0480 | 0.0707                                                   | 12.7777 |
|                                                   |              | 2019         | 3.2073                      | 3.2256     | 0.3210 | -3.1462                                                  | 9.5607  |
|                                                   |              | 2021         | -1.5039                     | 3.2256     | 0.6410 | -7.8573                                                  | 4.8496  |
|                                                   | 2021         | 2018         | 7,92806*                    | 3.2256     | 0.0150 | 1.5746                                                   | 14.2815 |
|                                                   |              | 2019         | 4.7111                      | 3.2256     | 0.1450 | -1.6423                                                  | 11.0646 |
|                                                   |              | 2020         | 1.5039                      | 3.2256     | 0.6410 | -4.8496                                                  | 7.8573  |

\* The mean difference is significant at the 0.05 level.

Table S2: Output of Tukey and LSD Fisher tests for Zn.

| Multiple Comparisons   |              |              |                             |               |       |                                                 |                |
|------------------------|--------------|--------------|-----------------------------|---------------|-------|-------------------------------------------------|----------------|
| Dependent Variable: Zn |              |              |                             |               |       |                                                 |                |
|                        | (I)<br>Years | (J)<br>Years | Mean<br>Difference<br>(I-J) | Std.<br>Error | Sig.  | 95%<br>Confidence<br>Interval<br>Lower<br>Bound | Upper<br>Bound |
| Tukey HSD              | 2018         | 2019         | -14.304                     | 5.545         | 0.051 | -28.649                                         | 0.041          |
|                        |              | 2020         | -28,75339*                  | 5.545         | 0.000 | -43.098                                         | -14.409        |
|                        |              | 2021         | -67,34468*                  | 5.545         | 0.000 | -81.690                                         | -53.000        |
|                        | 2019         | 2018         | 14.304                      | 5.545         | 0.051 | -0.041                                          | 28.649         |
|                        |              | 2020         | -14,44903*                  | 5.545         | 0.048 | -28.794                                         | -0.104         |
|                        |              | 2021         | -53,04032*                  | 5.545         | 0.000 | -67.385                                         | -38.696        |
|                        | 2020         | 2018         | 28,75339*                   | 5.545         | 0.000 | 14.409                                          | 43.098         |
|                        |              | 2019         | 14,44903*                   | 5.545         | 0.048 | 0.104                                           | 28.794         |
|                        |              | 2021         | -38,59129*                  | 5.545         | 0.000 | -52.936                                         | -24.246        |
|                        | 2021         | 2018         | 67,34468*                   | 5.545         | 0.000 | 53.000                                          | 81.690         |
|                        |              | 2019         | 53,04032*                   | 5.545         | 0.000 | 38.696                                          | 67.385         |
|                        |              | 2020         | 38,59129*                   | 5.545         | 0.000 | 24.246                                          | 52.936         |
| LSD                    | 2018         | 2019         | -14,30435*                  | 5.545         | 0.010 | -25.227                                         | -3.382         |
|                        |              | 2020         | -28,75339*                  | 5.545         | 0.000 | -39.676                                         | -17.831        |
|                        |              | 2021         | -67,34468*                  | 5.545         | 0.000 | -78.268                                         | -56.422        |
|                        | 2019         | 2018         | 14,30435*                   | 5.545         | 0.010 | 3.382                                           | 25.227         |
|                        |              | 2020         | -14,44903*                  | 5.545         | 0.010 | -25.372                                         | -3.526         |
|                        |              | 2021         | -53,04032*                  | 5.545         | 0.000 | -63.963                                         | -42.118        |
|                        | 2020         | 2018         | 28,75339*                   | 5.545         | 0.000 | 17.831                                          | 39.676         |
|                        |              | 2019         | 14,44903*                   | 5.545         | 0.010 | 3.526                                           | 25.372         |
|                        |              | 2021         | -38,59129*                  | 5.545         | 0.000 | -49.514                                         | -27.668        |
|                        | 2021         | 2018         | 67,34468*                   | 5.545         | 0.000 | 56.422                                          | 78.268         |
|                        |              | 2019         | 53,04032*                   | 5.545         | 0.000 | 42.118                                          | 63.963         |
|                        |              | 2020         | 38,59129*                   | 5.545         | 0.000 | 27.668                                          | 49.514         |

\* The mean difference is significant at the 0.05 level.

Table S3: Output of Tukey and LSD Fisher tests for Mn.

| Multiple Comparisons |           | Dependent Variable: Mn |                       |            |       |                                                       |          |
|----------------------|-----------|------------------------|-----------------------|------------|-------|-------------------------------------------------------|----------|
|                      | (I) Years | (J) Years              | Mean Difference (I-J) | Std. Error | Sig.  | 95% Confidence Interval<br>Lower Bound<br>Upper Bound |          |
| Tukey HSD            | 2018      | 2019                   | -14.49242             | 44.51651   | 0.988 | -129.6487                                             | 100.6639 |
|                      |           | 2020                   | -29.26839             | 44.51651   | 0.913 | -144.4247                                             | 85.8879  |
|                      |           | 2021                   | -26.49758             | 44.51651   | 0.933 | -141.6539                                             | 88.6587  |
|                      | 2019      | 2018                   | 14.49242              | 44.51651   | 0.988 | -100.6639                                             | 129.6487 |
|                      |           | 2020                   | -14.77597             | 44.51651   | 0.987 | -129.9323                                             | 100.3804 |
|                      |           | 2021                   | -12.00516             | 44.51651   | 0.993 | -127.1615                                             | 103.1512 |
|                      | 2020      | 2018                   | 29.26839              | 44.51651   | 0.913 | -85.8879                                              | 144.4247 |
|                      |           | 2019                   | 14.77597              | 44.51651   | 0.987 | -100.3804                                             | 129.9323 |
|                      |           | 2021                   | 2.77081               | 44.51651   | 1     | -112.3855                                             | 117.9271 |
|                      | 2021      | 2018                   | 26.49758              | 44.51651   | 0.933 | -88.6587                                              | 141.6539 |
|                      |           | 2019                   | 12.00516              | 44.51651   | 0.993 | -103.1512                                             | 127.1615 |
|                      |           | 2020                   | -2.77081              | 44.51651   | 1     | -117.9271                                             | 112.3855 |
| LSD                  | 2018      | 2019                   | -14.49242             | 44.51651   | 0.745 | -102.1781                                             | 73.1933  |
|                      |           | 2020                   | -29.26839             | 44.51651   | 0.511 | -116.9541                                             | 58.4173  |
|                      |           | 2021                   | -26.49758             | 44.51651   | 0.552 | -114.1833                                             | 61.1881  |
|                      | 2019      | 2018                   | 14.49242              | 44.51651   | 0.745 | -73.1933                                              | 102.1781 |
|                      |           | 2020                   | -14.77597             | 44.51651   | 0.74  | -102.4616                                             | 72.9097  |
|                      |           | 2021                   | -12.00516             | 44.51651   | 0.788 | -99.6908                                              | 75.6805  |
|                      | 2020      | 2018                   | 29.26839              | 44.51651   | 0.511 | -58.4173                                              | 116.9541 |
|                      |           | 2019                   | 14.77597              | 44.51651   | 0.74  | -72.9097                                              | 102.4616 |
|                      |           | 2021                   | 2.77081               | 44.51651   | 0.95  | -84.9149                                              | 90.4565  |
|                      | 2021      | 2018                   | 26.49758              | 44.51651   | 0.552 | -61.1881                                              | 114.1833 |
|                      |           | 2019                   | 12.00516              | 44.51651   | 0.788 | -75.6805                                              | 99.6908  |
|                      |           | 2020                   | -2.77081              | 44.51651   | 0.95  | -90.4565                                              | 84.9149  |

Table S4: Output of Tukey and LSD Fisher tests for Pb.

| Multiple Comparisons   |              |              |                          |               |       |                            |                |
|------------------------|--------------|--------------|--------------------------|---------------|-------|----------------------------|----------------|
| Dependent Variable: Pb |              |              |                          |               |       |                            |                |
|                        | (I)<br>Years | (J)<br>Years | Mean<br>Difference (I-J) | Std.<br>Error | Sig.  | 95% Confidence<br>Interval |                |
|                        |              |              |                          |               |       | Lower<br>Bound             | Upper<br>Bound |
| Tukey<br>HSD           | 2018         | 2019         | -1.92387                 | 3.0005        | 0.919 | -9.6856                    | 5.8379         |
|                        |              | 2020         | -3.85774                 | 3.0005        | 0.573 | -11.6195                   | 3.904          |
|                        |              | 2021         | -3.71548                 | 3.0005        | 0.603 | -11.4772                   | 4.0463         |
|                        | 2019         | 2018         | 1.92387                  | 3.0005        | 0.919 | -5.8379                    | 9.6856         |
|                        |              | 2020         | -1.93387                 | 3.0005        | 0.917 | -9.6956                    | 5.8279         |
|                        |              | 2021         | -1.79161                 | 3.0005        | 0.933 | -9.5534                    | 5.9702         |
|                        | 2020         | 2018         | 3.85774                  | 3.0005        | 0.573 | -3.904                     | 11.6195        |
|                        |              | 2019         | 1.93387                  | 3.0005        | 0.917 | -5.8279                    | 9.6956         |
|                        |              | 2021         | 0.14226                  | 3.0005        | 1     | -7.6195                    | 7.904          |
|                        | 2021         | 2018         | 3.71548                  | 3.0005        | 0.603 | -4.0463                    | 11.4772        |
|                        |              | 2019         | 1.79161                  | 3.0005        | 0.933 | -5.9702                    | 9.5534         |
|                        |              | 2020         | -0.14226                 | 3.0005        | 1     | -7.904                     | 7.6195         |
| LSD                    | 2018         | 2019         | -1.92387                 | 3.0005        | 0.522 | -7.8341                    | 3.9863         |
|                        |              | 2020         | -3.85774                 | 3.0005        | 0.2   | -9.7679                    | 2.0524         |
|                        |              | 2021         | -3.71548                 | 3.0005        | 0.217 | -9.6257                    | 2.1947         |
|                        | 2019         | 2018         | 1.92387                  | 3.0005        | 0.522 | -3.9863                    | 7.8341         |
|                        |              | 2020         | -1.93387                 | 3.0005        | 0.52  | -7.8441                    | 3.9763         |
|                        |              | 2021         | -1.79161                 | 3.0005        | 0.551 | -7.7018                    | 4.1186         |
|                        | 2020         | 2018         | 3.85774                  | 3.0005        | 0.2   | -2.0524                    | 9.7679         |
|                        |              | 2019         | 1.93387                  | 3.0005        | 0.52  | -3.9763                    | 7.8441         |
|                        |              | 2021         | 0.14226                  | 3.0005        | 0.962 | -5.7679                    | 6.0524         |
|                        | 2021         | 2018         | 3.71548                  | 3.0005        | 0.217 | -2.1947                    | 9.6257         |
|                        |              | 2019         | 1.79161                  | 3.0005        | 0.551 | -4.1186                    | 7.7018         |
|                        |              | 2020         | -0.14226                 | 3.0005        | 0.962 | -6.0524                    | 5.7679         |

Table S5: Output of Tukey and LSD Fisher tests for Ni.

| Multiple Comparisons   |              |              |                          |               |       |                                              |                |
|------------------------|--------------|--------------|--------------------------|---------------|-------|----------------------------------------------|----------------|
| Dependent Variable: Ni |              |              |                          |               |       |                                              |                |
|                        | (I)<br>Years | (J)<br>Years | Mean<br>Difference (I-J) | Std.<br>Error | Sig.  | 95% Confidence<br>Interval<br>Lower<br>Bound | Upper<br>Bound |
| Tukey<br>HSD           | 2018         | 2019         | -2.71113                 | 4.84143       | 0.944 | -15.2351                                     | 9.8128         |
|                        |              | 2020         | -5.42065                 | 4.84143       | 0.678 | -17.9446                                     | 7.1033         |
|                        |              | 2021         | -2.70871                 | 4.84143       | 0.944 | -15.2326                                     | 9.8152         |
|                        | 2019         | 2018         | 2.71113                  | 4.84143       | 0.944 | -9.8128                                      | 15.2351        |
|                        |              | 2020         | -2.70952                 | 4.84143       | 0.944 | -15.2334                                     | 9.8144         |
|                        |              | 2021         | 0.00242                  | 4.84143       | 1     | -12.5215                                     | 12.5263        |
|                        | 2020         | 2018         | 5.42065                  | 4.84143       | 0.678 | -7.1033                                      | 17.9446        |
|                        |              | 2019         | 2.70952                  | 4.84143       | 0.944 | -9.8144                                      | 15.2334        |
|                        |              | 2021         | 2.71194                  | 4.84143       | 0.944 | -9.812                                       | 15.2359        |
|                        | 2021         | 2018         | 2.70871                  | 4.84143       | 0.944 | -9.8152                                      | 15.2326        |
|                        |              | 2019         | -0.00242                 | 4.84143       | 1     | -12.5263                                     | 12.5215        |
|                        |              | 2020         | -2.71194                 | 4.84143       | 0.944 | -15.2359                                     | 9.812          |
| LSD                    | 2018         | 2019         | -2.71113                 | 4.84143       | 0.576 | -12.2475                                     | 6.8252         |
|                        |              | 2020         | -5.42065                 | 4.84143       | 0.264 | -14.957                                      | 4.1157         |
|                        |              | 2021         | -2.70871                 | 4.84143       | 0.576 | -12.245                                      | 6.8276         |
|                        | 2019         | 2018         | 2.71113                  | 4.84143       | 0.576 | -6.8252                                      | 12.2475        |
|                        |              | 2020         | -2.70952                 | 4.84143       | 0.576 | -12.2459                                     | 6.8268         |
|                        |              | 2021         | 0.00242                  | 4.84143       | 1     | -9.5339                                      | 9.5388         |
|                        | 2020         | 2018         | 5.42065                  | 4.84143       | 0.264 | -4.1157                                      | 14.957         |
|                        |              | 2019         | 2.70952                  | 4.84143       | 0.576 | -6.8268                                      | 12.2459        |
|                        |              | 2021         | 2.71194                  | 4.84143       | 0.576 | -6.8244                                      | 12.2483        |
|                        | 2021         | 2018         | 2.70871                  | 4.84143       | 0.576 | -6.8276                                      | 12.245         |
|                        |              | 2019         | -0.00242                 | 4.84143       | 1     | -9.5388                                      | 9.5339         |
|                        |              | 2020         | -2.71194                 | 4.84143       | 0.576 | -12.2483                                     | 6.8244         |

Table S6: Output of Tukey and LSD Fisher tests for Cr.

| Multiple Comparisons   |           |           |                       |            |       |                                        |             |
|------------------------|-----------|-----------|-----------------------|------------|-------|----------------------------------------|-------------|
| Dependent Variable: Cr |           |           |                       |            |       |                                        |             |
|                        | (I) Years | (J) Years | Mean Difference (I-J) | Std. Error | Sig.  | 95% Confidence Interval<br>Lower Bound | Upper Bound |
| Tukey HSD              | 2018      | 2019      | -10.66952             | 5.76182    | 0.252 | -25.5743                               | 4.2353      |
|                        |           | 2020      | -21,38065*            | 5.76182    | 0.001 | -36.2855                               | -6.4758     |
|                        |           | 2021      | -25,24645*            | 5.76182    | 0     | -40.1513                               | -10.3416    |
|                        | 2019      | 2018      | 10.66952              | 5.76182    | 0.252 | -4.2353                                | 25.5743     |
|                        |           | 2020      | -10.71113             | 5.76182    | 0.249 | -25.6159                               | 4.1937      |
|                        |           | 2021      | -14.57694             | 5.76182    | 0.058 | -29.4817                               | 0.3279      |
|                        | 2020      | 2018      | 21,38065*             | 5.76182    | 0.001 | 6.4758                                 | 36.2855     |
|                        |           | 2019      | 10.71113              | 5.76182    | 0.249 | -4.1937                                | 25.6159     |
|                        |           | 2021      | -3.86581              | 5.76182    | 0.908 | -18.7706                               | 11.039      |
|                        | 2021      | 2018      | 25,24645*             | 5.76182    | 0     | 10.3416                                | 40.1513     |
|                        |           | 2019      | 14.57694              | 5.76182    | 0.058 | -0.3279                                | 29.4817     |
|                        |           | 2020      | 3.86581               | 5.76182    | 0.908 | -11.039                                | 18.7706     |
| LSD                    | 2018      | 2019      | -10.66952             | 5.76182    | 0.065 | -22.0188                               | 0.6797      |
|                        |           | 2020      | -21,38065*            | 5.76182    | 0     | -32.7299                               | -10.0314    |
|                        |           | 2021      | -25,24645*            | 5.76182    | 0     | -36.5957                               | -13.8972    |
|                        | 2019      | 2018      | 10.66952              | 5.76182    | 0.065 | -0.6797                                | 22.0188     |
|                        |           | 2020      | -10.71113             | 5.76182    | 0.064 | -22.0604                               | 0.6381      |
|                        |           | 2021      | -14,57694*            | 5.76182    | 0.012 | -25.9262                               | -3.2277     |
|                        | 2020      | 2018      | 21,38065*             | 5.76182    | 0     | 10.0314                                | 32.7299     |
|                        |           | 2019      | 10.71113              | 5.76182    | 0.064 | -0.6381                                | 22.0604     |
|                        |           | 2021      | -3.86581              | 5.76182    | 0.503 | -15.2151                               | 7.4834      |
|                        | 2021      | 2018      | 25,24645*             | 5.76182    | 0     | 13.8972                                | 36.5957     |
|                        |           | 2019      | 14,57694*             | 5.76182    | 0.012 | 3.2277                                 | 25.9262     |
|                        |           | 2020      | 3.86581               | 5.76182    | 0.503 | -7.4834                                | 15.2151     |

\* The mean difference is significant at the 0.05 level.

Table S7: Output of Tukey and LSD Fisher tests for Co.

| Multiple Comparisons   |              |              |                          |               |       |                            |                |
|------------------------|--------------|--------------|--------------------------|---------------|-------|----------------------------|----------------|
| Dependent Variable: Co |              |              |                          |               |       |                            |                |
|                        | (I)<br>Years | (J)<br>Years | Mean<br>Difference (I-J) | Std.<br>Error | Sig.  | 95% Confidence<br>Interval |                |
|                        |              |              |                          |               |       | Lower<br>Bound             | Upper<br>Bound |
| Tukey<br>HSD           | 2018         | 2019         | -2.34403                 | 1.78905       | 0.557 | -6.972                     | 2.2839         |
|                        |              | 2020         | -4,68177*                | 1.78905       | 0.046 | -9.3097                    | -0.0538        |
|                        |              | 2021         | -5,58694*                | 1.78905       | 0.011 | -10.2149                   | -0.959         |
|                        | 2019         | 2018         | 2.34403                  | 1.78905       | 0.557 | -2.2839                    | 6.972          |
|                        |              | 2020         | -2.33774                 | 1.78905       | 0.56  | -6.9657                    | 2.2902         |
|                        |              | 2021         | -3.2429                  | 1.78905       | 0.27  | -7.8709                    | 1.3851         |
|                        | 2020         | 2018         | 4,68177*                 | 1.78905       | 0.046 | 0.0538                     | 9.3097         |
|                        |              | 2019         | 2.33774                  | 1.78905       | 0.56  | -2.2902                    | 6.9657         |
|                        |              | 2021         | -0.90516                 | 1.78905       | 0.958 | -5.5331                    | 3.7228         |
|                        | 2021         | 2018         | 5,58694*                 | 1.78905       | 0.011 | 0.959                      | 10.2149        |
|                        |              | 2019         | 3.2429                   | 1.78905       | 0.27  | -1.3851                    | 7.8709         |
|                        |              | 2020         | 0.90516                  | 1.78905       | 0.958 | -3.7228                    | 5.5331         |
| LSD                    | 2018         | 2019         | -2.34403                 | 1.78905       | 0.191 | -5.868                     | 1.1799         |
|                        |              | 2020         | -4,68177*                | 1.78905       | 0.009 | -8.2057                    | -1.1578        |
|                        |              | 2021         | -5,58694*                | 1.78905       | 0.002 | -9.1109                    | -2.063         |
|                        | 2019         | 2018         | 2.34403                  | 1.78905       | 0.191 | -1.1799                    | 5.868          |
|                        |              | 2020         | -2.33774                 | 1.78905       | 0.193 | -5.8617                    | 1.1862         |
|                        |              | 2021         | -3.2429                  | 1.78905       | 0.071 | -6.7669                    | 0.2811         |
|                        | 2020         | 2018         | 4,68177*                 | 1.78905       | 0.009 | 1.1578                     | 8.2057         |
|                        |              | 2019         | 2.33774                  | 1.78905       | 0.193 | -1.1862                    | 5.8617         |
|                        |              | 2021         | -0.90516                 | 1.78905       | 0.613 | -4.4291                    | 2.6188         |
|                        | 2021         | 2018         | 5,58694*                 | 1.78905       | 0.002 | 2.063                      | 9.1109         |
|                        |              | 2019         | 3.2429                   | 1.78905       | 0.071 | -0.2811                    | 6.7669         |
|                        |              | 2020         | 0.90516                  | 1.78905       | 0.613 | -2.6188                    | 4.4291         |

\* The mean difference is significant at the 0.05 level.

Table S8: Output of Games-Howell test for Cd.

| Multiple Comparisons   |           |                       |            |       |                         |             |
|------------------------|-----------|-----------------------|------------|-------|-------------------------|-------------|
| Dependent Variable: Cd |           |                       |            |       |                         |             |
| Games-Howell           |           |                       |            |       |                         |             |
| (I) Years              | (J) Years | Mean Difference (I-J) | Std. Error | Sig.  | 95% Confidence Interval |             |
|                        |           |                       |            |       | Lower Bound             | Upper Bound |
| 2018                   | 2019      | -,10161*              | 0.03369    | 0.016 | -0.1894                 | -0.0138     |
|                        | 2020      | -,20742*              | 0.04039    | 0     | -0.3127                 | -0.1022     |
|                        | 2021      | ,14855*               | 0.04946    | 0.017 | 0.0194                  | 0.2777      |
| 2019                   | 2018      | ,10161*               | 0.03369    | 0.016 | 0.0138                  | 0.1894      |
|                        | 2020      | -,10581*              | 0.03756    | 0.029 | -0.2038                 | -0.0078     |
|                        | 2021      | ,25016*               | 0.04718    | 0     | 0.1267                  | 0.3737      |
| 2020                   | 2018      | ,20742*               | 0.04039    | 0     | 0.1022                  | 0.3127      |
|                        | 2019      | ,10581*               | 0.03756    | 0.029 | 0.0078                  | 0.2038      |
|                        | 2021      | ,35597*               | 0.05217    | 0     | 0.2199                  | 0.492       |
| 2021                   | 2018      | -,14855*              | 0.04946    | 0.017 | -0.2777                 | -0.0194     |
|                        | 2019      | -,25016*              | 0.04718    | 0     | -0.3737                 | -0.1267     |
|                        | 2020      | -,35597*              | 0.05217    | 0     | -0.492                  | -0.2199     |

\* The mean difference is significant at the 0.05 level.
